# Supplementary material for: Downregulation of FOXP1 Inhibits Cell Proliferation in Hepatocellular Carcinoma by Inducing G1/S Phase Cell Cycle Arrest
Source: Int J Mol Sci. 2016 Sep 8;17(9):1501. doi: 10.3390/ijms17091501 (PMC5037778; doi:10.3390/ijms17091501)
Supplement: Supplementary file 1 [file ijms-17-01501-s001.pdf]

# Supplementary Materials: Downregulation of FOXP1 Inhibits Cell Proliferation in Hepatocellular Carcinoma by Inducing G1/S Phase Cell Cycle Arrest

Xin Wang, Ji Sun, Meiling Cui, Fangyu Zhao, Chao Ge, Taoyang Chen, Ming Yao and Jinjun Li

**Table S1.** Antibodies used for Western blot.

| Antibody       | Host              | Dilution | Company                   |
|----------------|-------------------|----------|---------------------------|
| FOXP1          | Rabbit polyclonal | 1:500    | Cell Signaling Technology |
| CDK4           | Rabbit polyclonal | 1:200    | Santa Cruz                |
| CDK6           | Mouse mAb IgG1    | 1:100    | Santa Cruz                |
| Cyclin D1      | Goat polyclonal   | 1:200    | R&D                       |
| p-Rb           | Rabbit polyclonal | 1:500    | Cell Signaling Technology |
| Rb             | Mouse mAb IgG2a   | 1:500    | Cell Signaling Technology |
| E2F1           | Mouse mAb IgG2a   | 1:200    | Santa Cruz                |
| $\beta$ -actin | Mouse mAb         | 1:10,000 | Sigma-Aldrich             |

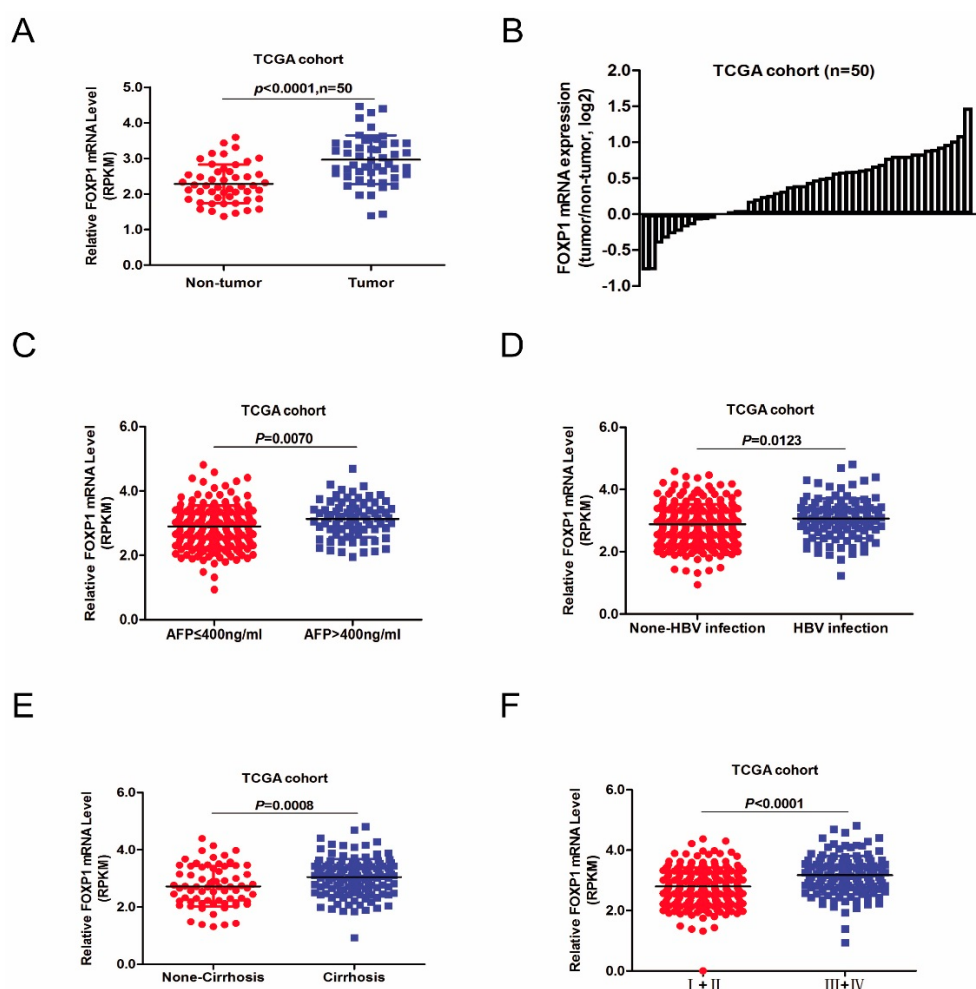

**Figure S1.** FOXP1 expression in HCC clinical samples and its relationship with clinicopathological parameters of HCC patients according to TCGA. (A) FOXP1 mRNA level in the TCGA cohort; (B) The fold change of FOXP1 level in paired tumor/non-tumorous tissues of the TCGA cohort; (C–F) Relationship between FOXP1 mRNA level and serum AFP level (C); HBV infection (D); liver cirrhosis (E) and histological grades (F). In the TCGA cohort, data are depicted as RPKM (read per kilo bases per million reads).

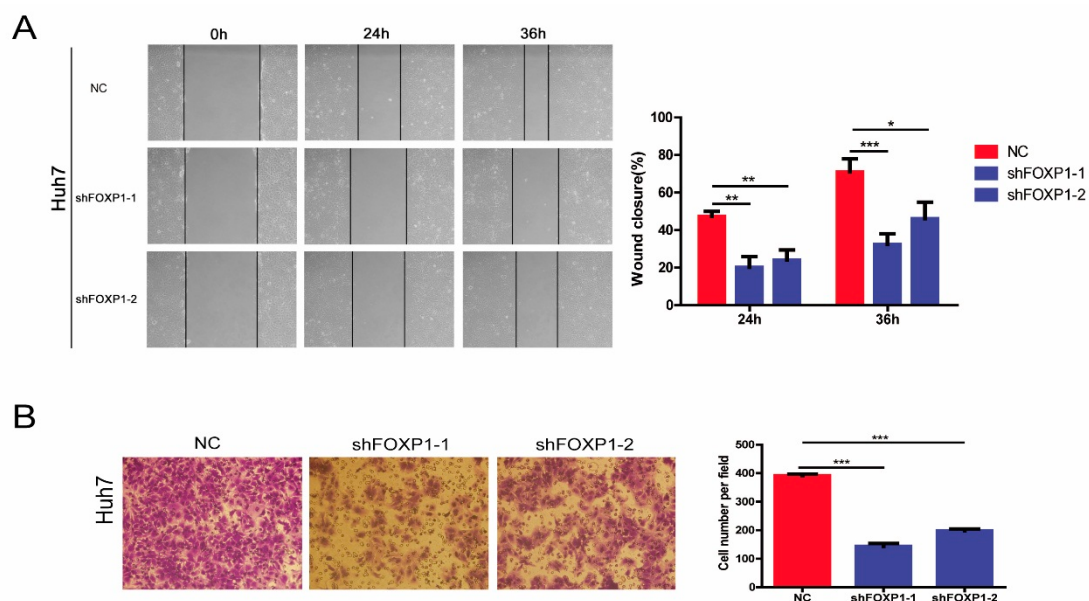

**Figure S2.** The effect of FOXP1 on the migration and invasion ability of HCC cells in vitro. (A) Wound healing assays for Huh7 cells that were stably transfected with shFOXP1 or NC; (B) Transwell invasion assays for Huh7 cells that were stably transfected with shFOXP1 or NC. \*\*\*  $p < 0.001$ , \*\*  $p < 0.01$ , \*  $p < 0.05$ .
